# Supplementary material for: Lanthanide metal–organic frameworks constructed by asymmetric 2-nitrobiphenyl-4,4′-dicarboxylate ligand: syntheses, structures, luminescence and magnetic investigations
Source: Royal Society of Chemistry journal article supplement (doi:10.1039/c3ce41370e), 2013-01-01
Supplement: c3ce41370e.pdf [file c3ce41370e.pdf]

## Electronic Supplementary Information (ESI)

### **Lanthanide metal-organic frameworks constructed by asymmetric 2-nitro-biphenyl-4,4'-dicarboxylate ligand: syntheses, structures, luminescence and magnetic investigations**

Li-Rong Guo, Xiao-Liang Tang, Zheng-Hua Ju, Kai-Ming Zhang, Hui-E Jiang and Wei-Sheng Liu\*

Key Laboratory of Nonferrous Metal Chemistry and Resources Utilization of Gansu Province, State Key Laboratory of Applied Organic Chemistry, College of Chemistry and Chemical Engineering, Lanzhou University, Lanzhou, 730000, P. R. China.  
Fax: +86-931-8912582; Tel: +86-931-8915151; E-mail: liuws@lzu.edu.cn

**Table S1** Selected bond lengths (Å) and angles (°) for complexes **1-8**<sup>a</sup>

| <b>1</b>    |           |             |           |             |           |
|-------------|-----------|-------------|-----------|-------------|-----------|
| Eu1-O2C     | 2.172(18) | Eu1-O11     | 2.474(15) | N1-O6       | 1.230(20) |
| Eu1-O7      | 2.290(20) | Eu1-O1W     | 2.540(30) | N2-C20      | 1.462(6)  |
| Eu1-O4B     | 2.401(17) | Eu1-O1D     | 2.560(20) | N2-O9       | 1.251(8)  |
| Eu1-O3      | 2.431(17) | N1-C13      | 1.482(19) | N2-O10      | 1.271(9)  |
| Eu1-O8A     | 2.460(30) | N1-O5       | 1.260(20) |             |           |
| O2C-Eu1-O7  | 61.8(7)   | O7-Eu1-O11  | 78.4(6)   | O3-Eu1-O1W  | 76.7(11)  |
| O2C-Eu1-O4B | 93.8(6)   | O7-Eu1-O1W  | 130.2(14) | O3-Eu1-O1D  | 76.9(7)   |
| O2C-Eu1-O3  | 153.0(5)  | O7-Eu1-O1D  | 85.7(7)   | O8A-Eu1-O11 | 143.3(9)  |
| O2C-Eu1-O8A | 77.5(8)   | O4B-Eu1-O3  | 90.5(6)   | O8A-Eu1-O1W | 68.4(11)  |
| O2C-Eu1-O11 | 137.1(6)  | O4B-Eu1-O8A | 145.0(7)  | O8A-Eu1-O1D | 82.5(8)   |
| O2C-Eu1-O1W | 78.4(11)  | O4B-Eu1-O11 | 60.3(5)   | O11-Eu1-O1W | 121.5(10) |
| O2C-Eu1-O1D | 119.0(6)  | O4B-Eu1-O1W | 76.6(11)  | O11-Eu1-O1D | 70.1(6)   |
| O7-Eu1-O4B  | 77.3(7)   | O4B-Eu1-O1D | 129.7(6)  | O1W-Eu1-O1D | 142.4(13) |
| O7-Eu1-O3   | 144.7(7)  | O3-Eu1-O8A  | 83.7(7)   |             |           |
| O7-Eu1-O8A  | 124.5(6)  | O3-Eu1-O11  | 66.9(5)   |             |           |
| <b>2</b>    |           |             |           |             |           |
| Gd1-O2C     | 2.109(17) | Gd1-O3      | 2.459(15) | N1-O6       | 1.180(30) |
| Gd1-O7      | 2.320(17) | Gd1-O11     | 2.603(18) | N2-C20      | 1.464(6)  |
| Gd1-O4B     | 2.388(15) | Gd1-O1D     | 2.671(19) | N2-O9       | 1.255(8)  |
| Gd1-O1W     | 2.400(30) | N1-C13      | 1.480(20) | N2-O10      | 1.266(8)  |
| Gd1-O8A     | 2.391(19) | N1-O5       | 1.300(30) |             |           |
| O2C-Gd1-O7  | 60.6(6)   | O7-Gd1-O3   | 139.8(6)  | O1W-Gd1-O11 | 124.8(9)  |
| O2C-Gd1-O4B | 90.0(6)   | O7-Gd1-O11  | 76.4(6)   | O1W-Gd1-O1D | 145.3(7)  |
| O2C-Gd1-O1W | 79.9(7)   | O7-Gd1-O1D  | 82.7(6)   | O8A-Gd1-O3  | 85.0(6)   |
| O2C-Gd1-O8A | 80.3(7)   | O4B-Gd1-O1W | 79.1(7)   | O8A-Gd1-O11 | 140.0(7)  |
| O2C-Gd1-O3  | 159.6(6)  | O4B-Gd1-O8A | 149.8(6)  | O8A-Gd1-O1D | 82.1(6)   |
| O2C-Gd1-O11 | 134.9(7)  | O4B-Gd1-O3  | 89.5(5)   | O3-Gd1-O11  | 64.3(5)   |
| O2C-Gd1-O1D | 117.2(6)  | O4B-Gd1-O11 | 59.6(6)   | O3-Gd1-O1D  | 74.4(5)   |
| O7-Gd1-O4B  | 77.0(5)   | O4B-Gd1-O1D | 124.9(6)  | O11-Gd1-O1D | 66.0(6)   |
| O7-Gd1-O1W  | 130.5(7)  | O1W-Gd1-O8A | 70.8(8)   |             |           |
| O7-Gd1-O8A  | 124.3(5)  | O1W-Gd1-O3  | 81.9(7)   |             |           |
| <b>3</b>    |           |             |           |             |           |
| Nd1-O2C     | 2.208(16) | Nd1-O8A     | 2.423(18) | N1-O6       | 1.150(20) |
| Nd1-O7      | 2.384(15) | Nd1-O11     | 2.592(12) | N2-C20      | 1.463(6)  |
| Nd1-O4B     | 2.467(13) | Nd1-O1D     | 2.677(16) | N2-O9       | 1.255(8)  |
| Nd1-O3      | 2.467(14) | N1-C13      | 1.500(20) | N2-O10      | 1.264(8)  |
| Nd1-O1W     | 2.454(15) | N1-O5       | 1.290(30) |             |           |
| O2C-Nd1-O7  | 60.9(5)   | O7-Nd1-O8A  | 124.9(5)  | O3-Nd1-O11  | 66.7(4)   |
| O2C-Nd1-O4B | 93.8(5)   | O7-Nd1-O11  | 74.9(5)   | O3-Nd1-O1D  | 75.8(5)   |
| O2C-Nd1-O3  | 157.9(5)  | O7-Nd1-O1D  | 83.7(5)   | O1W-Nd1-O8A | 71.8(5)   |
| O2C-Nd1-O1W | 77.7(5)   | O4B-Nd1-O3  | 91.0(5)   | O1W-Nd1-O11 | 123.4(5)  |
| O2C-Nd1-O8A | 78.7(6)   | O4B-Nd1-O1W | 76.2(5)   | O1W-Nd1-O1D | 148.3(5)  |
| O2C-Nd1-O11 | 133.4(5)  | O4B-Nd1-O8A | 148.0(5)  | O8A-Nd1-O11 | 144.2(6)  |
| O2C-Nd1-O1D | 117.5(6)  | O4B-Nd1-O11 | 59.0(4)   | O8A-Nd1-O1D | 83.6(5)   |
| O7-Nd1-O4B  | 74.8(5)   | O4B-Nd1-O1D | 126.4(5)  | O11-Nd1-O1D | 68.2(4)   |
| O7-Nd1-O3   | 140.9(6)  | O3-Nd1-O1W  | 82.6(5)   |             |           |
| O7-Nd1-O1W  | 126.7(6)  | O3-Nd1-O8A  | 85.8(5)   |             |           |
| <b>4</b>    |           |             |           |             |           |
| La1-O2C     | 2.370(20) | La1-O1W     | 2.611(12) | N1-O6       | 1.150(20) |
| La1-O7      | 2.400(20) | La1-O11     | 2.608(17) | N2-C20      | 1.463(6)  |
| La1-O3      | 2.494(16) | La1-O1D     | 2.640(20) | N2-O9       | 1.252(8)  |
| La1-O4B     | 2.540(18) | N1-C13      | 1.460(20) | N2-O10      | 1.271(9)  |
| La1-O8A     | 2.550(30) | N1-O5       | 1.290(20) |             |           |
| O2C-La1-O7  | 61.8(7)   | O7-La1-O1W  | 123.9(7)  | O4B-La1-O11 | 61.9(6)   |

|             |           |             |            |             |           |
|-------------|-----------|-------------|------------|-------------|-----------|
| O2C-La1-O3  | 153.4(5)  | O7-La1-O11  | 78.3(7)    | O4B-La1-O1D | 130.4(5)  |
| O2C-La1-O4B | 93.1(6)   | O7-La1-O1D  | 86.3(7)    | O8A-La1-O1W | 68.9(12)  |
| O2C-La1-O8A | 76.8(7)   | O3-La1-O4B  | 91.3(5)    | O8A-La1-O11 | 143.7(8)  |
| O2C-La1-O1W | 74.5(8)   | O3-La1-O8A  | 83.8(7)    | O8A-La1-O1D | 84.9(7)   |
| O2C-La1-O11 | 137.7(6)  | O3-La1-O1W  | 81.7(7)    | O1W-La1-O11 | 122.9(12) |
| O2C-La1-O1D | 118.3(7)  | O3-La1-O11  | 66.3(5)    | O1W-La1-O1D | 147.8(8)  |
| O7-La1-O3   | 144.3(6)  | O3-La1-O1D  | 77.2(6)    | O11-La1-O1D | 69.4(6)   |
| O7-La1-O4B  | 75.6(6)   | O4B-La1-O8A | 142.4(6)   |             |           |
| O7-La1-O8A  | 126.4(5)  | O4B-La1-O1W | 73.5(11)   |             |           |
| <b>5</b>    |           |             |            |             |           |
| Ce1-O2C     | 2.190(20) | Ce1-O11     | 2.690(30)  | N1-O6       | 1.160(30) |
| Ce1-O7      | 2.420(20) | Ce1-O1W     | 2.563(12)  | N2-C20      | 1.462(6)  |
| Ce1-O3      | 2.548(17) | Ce1-O1D     | 2.740(20)  | N2-O9       | 1.257(8)  |
| Ce1-O4B     | 2.520(20) | N1-C13      | 1.4250(30) | N2-O10      | 1.266(8)  |
| Ce1-O8A     | 2.450(30) | N1-O5       | 1270(30)   |             |           |
| O2C-Ce1-O7  | 61.5(8)   | O7-Ce1-O11  | 75.4(8)    | O4B-Ce1-O1W | 77.8(6)   |
| O2C-Ce1-O3  | 159.5(7)  | O7-Ce1-O1W  | 128.8(7)   | O4B-Ce1-O1D | 124.4(6)  |
| O2C-Ce1-O4B | 96.5(7)   | O7-Ce1-O1D  | 83.8(7)    | O8A-Ce1-O11 | 140.9(9)  |
| O2C-Ce1-O8A | 79.9(8)   | O3-Ce1-O4B  | 89.1(6)    | O8A-Ce1-O1W | 70.4(7)   |
| O2C-Ce1-O11 | 135.3(8)  | O3-Ce1-O8A  | 85.0(7)    | O8A-Ce1-O1D | 84.0(7)   |
| O2C-Ce1-O1W | 79.9(6)   | O3-Ce1-O11  | 63.9(7)    | O11-Ce1-O1W | 123.5(8)  |
| O2C-Ce1-O1D | 117.2(7)  | O3-Ce1-O1W  | 82.1(6)    | O11-Ce1-O1D | 66.0(8)   |
| O7-Ce1-O3   | 138.8(7)  | O3-Ce1-O1D  | 74.4(7)    | O1W-Ce1-O1D | 146.5(6)  |
| O7-Ce1-O4B  | 74.9(6)   | O4B-Ce1-O8A | 148.1(7)   |             |           |
| O7-Ce1-O8A  | 127.5(5)  | O4B-Ce1-O11 | 59.1(8)    |             |           |
| <b>6</b>    |           |             |            |             |           |
| Pr1-O2C     | 2.180(20) | Pr1-O11     | 2.660(20)  | N1-O6       | 1.130(30) |
| Pr1-O7      | 2.400(20) | Pr1-O1W     | 2.529(11)  | N2-C20      | 1.463(6)  |
| Pr1-O3      | 2.505(17) | Pr1-O1D     | 2.710(20)  | N2-O9       | 1.256(8)  |
| Pr1-O4B     | 2.505(19) | N1-C13      | 1.410(20)  | N2-O10      | 1.266(8)  |
| Pr1-O8A     | 2.420(30) | N1-O5       | 1.360(30)  |             |           |
| O2C-Pr1-O7  | 60.2(8)   | O7-Pr1-O11  | 76.5(8)    | O4B-Pr1-O1W | 77.0(5)   |
| O2C-Pr1-O3  | 159.5(6)  | O7-Pr1-O1W  | 127.8(7)   | O4B-Pr1-O1D | 125.3(6)  |
| O2C-Pr1-O4B | 95.0(7)   | O7-Pr1-O1D  | 84.4(8)    | O8A-Pr1-O11 | 140.0(10) |
| O2C-Pr1-O8A | 81.5(10)  | O3-Pr1-O4B  | 89.7(6)    | O8A-Pr1-O1W | 71.9(8)   |
| O2C-Pr1-O11 | 134.7(7)  | O3-Pr1-O8A  | 84.2(8)    | O8A-Pr1-O1D | 82.3(9)   |
| O2C-Pr1-O1W | 79.3(6)   | O3-Pr1-O11  | 64.2(6)    | O11-Pr1-O1W | 123.2(6)  |
| O2C-Pr1-O1D | 117.8(8)  | O3-Pr1-O1W  | 82.3(5)    | O11-Pr1-O1D | 66.6(7)   |
| O7-Pr1-O3   | 140.1(7)  | O3-Pr1-O1D  | 74.4(7)    | O1W-Pr1-O1D | 146.8(6)  |
| O7-Pr1-O4B  | 75.4(7)   | O4B-Pr1-O8A | 148.9(8)   |             |           |
| O7-Pr1-O8A  | 126.5(6)  | O4B-Pr1-O11 | 59.5(6)    |             |           |
| <b>7</b>    |           |             |            |             |           |
| Sm1-O2C     | 2.070(20) | Sm1-O1W     | 2.481(12)  | N1-O6       | 1.150(30) |
| Sm1-O7      | 2.350(20) | Sm1-O11     | 2.648(18)  | N2-C20      | 1.464(6)  |
| Sm1-O4B     | 2.465(17) | Sm1-O1D     | 2.690(20)  | N2-O9       | 1.257(8)  |
| Sm1-O8A     | 2.370(30) | N1-C13      | 1.470(20)  | N2-O10      | 1.265(8)  |
| Sm1-O3      | 2.474(19) | N1-O5       | 1.340(30)  |             |           |
| O2C-Sm1-O7  | 59.9(8)   | O7-Sm1-O1W  | 128.4(7)   | O8A-Sm1-O11 | 139.4(9)  |
| O2C-Sm1-O4B | 95.8(6)   | O7-Sm1-O11  | 76.4(7)    | O8A-Sm1-O1D | 81.8(8)   |
| O2C-Sm1-O8A | 81.9(9)   | O7-Sm1-O1D  | 84.8(8)    | O3-Sm1-O1W  | 81.5(6)   |
| O2C-Sm1-O3  | 160.1(6)  | O4B-Sm1-O8A | 150.5(7)   | O3-Sm1-O11  | 63.8(6)   |
| O2C-Sm1-O1W | 80.5(6)   | O4B-Sm1-O3  | 88.9(7)    | O3-Sm1-O1D  | 73.9(7)   |
| O2C-Sm1-O11 | 134.5(7)  | O4B-Sm1-O1W | 78.0(5)    | O1W-Sm1-O11 | 122.7(6)  |
| O2C-Sm1-O1D | 118.2(7)  | O4B-Sm1-O11 | 58.5(6)    | O1W-Sm1-O1D | 146.0(6)  |
| O7-Sm1-O4B  | 74.9(6)   | O4B-Sm1-O1D | 123.7(6)   | O11-Sm1-O1D | 65.9(6)   |
| O7-Sm1-O8A  | 126.4(6)  | O8A-Sm1-O3  | 84.6(8)    |             |           |
| O7-Sm1-O3   | 139.7(8)  | O8A-Sm1-O1W | 72.6(8)    |             |           |

| <b>8</b>    |           |             |           |             |           |
|-------------|-----------|-------------|-----------|-------------|-----------|
| Tb1-O2C     | 1.930(30) | Tb1-O1W     | 2.513(16) | N1-O6       | 1.180(40) |
| Tb1-O8A     | 2.260(50) | Tb1-O11     | 2.610(20) | N2-C20      | 1.461(6)  |
| Tb1-O7      | 2.340(30) | Tb1-O1D     | 2.720(30) | N2-O9       | 1.259(8)  |
| Tb1-O4B     | 2.370(20) | N1-C13      | 1.460(30) | N2-O10      | 1.267(8)  |
| Tb1-O3      | 2.480(20) | N1-O5       | 1.260(40) |             |           |
| O2C-Tb1-O8A | 86.4(14)  | O8A-Tb1-O1W | 75.4(14)  | O4B-Tb1-O11 | 55.4(8)   |
| O2C-Tb1-O7  | 60.6(10)  | O8A-Tb1-O11 | 135.8(15) | O4B-Tb1-O1D | 120.2(8)  |
| O2C-Tb1-O4B | 97.3(9)   | O8A-Tb1-O1D | 78.6(15)  | O3-Tb1-O1W  | 81.4(8)   |
| O2C-Tb1-O3  | 162.8(8)  | O7-Tb1-O4B  | 74.9(8)   | O3-Tb1-O11  | 63.4(7)   |
| O2C-Tb1-O1W | 82.8(9)   | O7-Tb1-O3   | 136.4(9)  | O3-Tb1-O1D  | 73.3(8)   |
| O2C-Tb1-O11 | 132.2(9)  | O7-Tb1-O1W  | 131.8(10) | O1W-Tb1-O11 | 122.7(9)  |
| O2C-Tb1-O1D | 117.9(9)  | O7-Tb1-O11  | 73.8(9)   | O1W-Tb1-O1D | 145.5(9)  |
| O8A-Tb1-O7  | 127.0(8)  | O7-Tb1-O1D  | 82.3(10)  | O11-Tb1-O1D | 65.3(8)   |
| O8A-Tb1-O4B | 155.0(12) | O4B-Tb1-O3  | 86.8(7)   |             |           |
| O8A-Tb1-O3  | 83.1(12)  | O4B-Tb1-O1W | 80.5(8)   |             |           |

<sup>a</sup> Symmetry codes: A: -x + 2, -y + 1, -z + 2; B: -x + 1, -y + 1, -z + 2; C: x, y, z + 1; D: -x + 2, -y + 1, -z + 1.

**Table S2** Continuous Shape Measures (CShMs) of the coordination sphere of Ln(III) in complexes **1-8**

| CShMs<br>Complexes             | Octagon<br>( $D_{8h}$ ) | Heptagonal<br>pyramid<br>( $C_{7v}$ ) | Hexagonal<br>bipyramid<br>( $D_{6h}$ ) | Cube<br>( $O_h$ ) | Square<br>antiprism<br>( $D_{4d}$ ) | Triangular<br>dodecahedron<br>( $D_{2d}$ ) | Delta $\Delta$<br>(path) |
|--------------------------------|-------------------------|---------------------------------------|----------------------------------------|-------------------|-------------------------------------|--------------------------------------------|--------------------------|
| <b>4</b> (La-NO <sub>2</sub> ) | 30.06019                | 22.34302                              | 15.60951                               | 10.98305          | <b>2.44744</b>                      | <b>2.10040</b>                             | <b>0.784</b>             |
| <b>5</b> (Ce-NO <sub>2</sub> ) | 30.36443                | 21.92258                              | 15.78234                               | 11.41003          | <b>2.76238</b>                      | <b>2.37483</b>                             | <b>0.874</b>             |
| <b>6</b> (Pr-NO <sub>2</sub> ) | 30.40270                | 22.09121                              | 15.76218                               | 11.12154          | <b>2.66028</b>                      | <b>2.34942</b>                             | <b>0.845</b>             |
| <b>3</b> (Nd-NO <sub>2</sub> ) | 30.32569                | 22.16273                              | 15.93143                               | 11.30358          | <b>2.49645</b>                      | <b>2.35991</b>                             | <b>0.916</b>             |
| <b>7</b> (Sm-NO <sub>2</sub> ) | 30.62776                | 21.94864                              | 15.72264                               | 11.17153          | <b>2.80056</b>                      | <b>2.49586</b>                             | <b>0.927</b>             |
| <b>1</b> (Eu-NO <sub>2</sub> ) | 30.62828                | 21.34102                              | 16.17977                               | 11.34817          | <b>2.29691</b>                      | <b>2.32081</b>                             | <b>0.799</b>             |
| <b>2</b> (Gd-NO <sub>2</sub> ) | 30.55985                | 21.82165                              | 16.20503                               | 11.42644          | <b>2.66203</b>                      | <b>2.43395</b>                             | <b>0.890</b>             |
| <b>8</b> (Tb-NO <sub>2</sub> ) | 30.82879                | 22.50488                              | 16.05152                               | 11.23072          | <b>3.04076</b>                      | <b>2.66603</b>                             | <b>1.001</b>             |

**Table S3** The Ln-O-C(-O<sup>-</sup>) angles (°) of complexes **1-8**

| <b>4</b>    |           | <b>5</b>    |           | <b>6</b>    |           |
|-------------|-----------|-------------|-----------|-------------|-----------|
| C1-O1-La1D  | 101.0(20) | C1-O1-Ce1D  | 99.0(20)  | C1-O1-Pr1D  | 105.9(13) |
| C1-O2-La1E  | 170.0(30) | C1-O2-Ce1E  | 172.0(30) | C1-O2-Pr1E  | 172.9(14) |
| C14-O3-La1  | 146.0(8)  | C14-O3-Ce1  | 140.9(9)  | C14-O3-Pr1  | 142.3(8)  |
| C14-O4-La1B | 129.3(12) | C14-O4-Ce1B | 126.9(12) | C14-O4-Pr1B | 127.7(12) |
| C15-O7-La1  | 150.8(17) | C15-O7-Ce1  | 150.0(17) | C15-O7-Pr1  | 150.0(20) |
| C15-O8-La1A | 136.9(15) | C15-O8-Ce1A | 136.6(16) | C15-O8-Pr1A | 136.0(20) |
| <b>3</b>    |           | <b>7</b>    |           | <b>1</b>    |           |
| C1-O1-Nd1D  | 103.1(19) | C1-O1-Sm1D  | 100.7(16) | C1-O1-Eu1D  | 105.5(15) |
| C1-O2-Nd1E  | 172.0(20) | C1-O2-Sm1E  | 177.0(20) | C1-O2-Eu1E  | 175.3(17) |
| C14-O3-Nd1  | 143.3(9)  | C14-O3-Sm1  | 141.8(9)  | C14-O3-Eu1  | 145.4(8)  |
| C14-O4-Nd1B | 126.9(12) | C14-O4-Sm1B | 126.8(12) | C14-O4-Eu1B | 130.1(11) |
| C15-O7-Nd1  | 152.3(15) | C15-O7-Sm1  | 148.5(19) | C15-O7-Eu1  | 152.5(18) |
| C15-O8-Nd1A | 139.5(14) | C15-O8-Sm1A | 135.3(18) | C15-O8-Eu1A | 136.4(15) |

| <b>2</b>    |           | <b>8</b>    |           |
|-------------|-----------|-------------|-----------|
| C1-O1-Gd1D  | 103.0(17) | C1-O1-Tb1D  | 98.0(20)  |
| C1-O2-Gd1E  | 177.0(20) | C1-O2-Tb1E  | 175.0(30) |
| C14-O3-Gd1  | 142.3(9)  | C14-O3-Tb1  | 139.2(11) |
| C14-O4-Gd1B | 128.1(12) | C14-O4-Tb1B | 126.4(14) |
| C15-O7-Gd1  | 153.1(16) | C15-O7-Tb1  | 147.0(20) |
| C15-O8-Gd1A | 137.0(15) | C15-O8-Tb1A | 135.0(30) |

<sup>a</sup> Symmetry codes: A: -x + 2, -y + 1, -z + 2; B: -x + 1, -y + 1, -z + 2; C: x, y, z + 1; D: -x + 2, -y + 1, -z + 1; E: x, y, z - 1.

**Table S4** The integral intensities of  ${}^5D_0 \rightarrow {}^7F_J$  ( $J = 0, 1, 2, 3, 4$ ) transitions for complex **1**\*

| Integral ranges | ${}^5D_0 \rightarrow {}^7F_J$ transitions | Integral intensities | Integral ratio | $I_{\text{tot}}/I_{\text{MD}}$ |
|-----------------|-------------------------------------------|----------------------|----------------|--------------------------------|
| 577-581 nm      | $J = 0$                                   | $1.64 \times 10^4$   | 0.003          | 1/0.139 = 7.19                 |
| 583-603 nm      | $J = 1$                                   | $77.60 \times 10^4$  | 0.139          |                                |
| 605-638 nm      | $J = 2$                                   | $298.13 \times 10^4$ | 0.534          |                                |
| 647-657 nm      | $J = 3$                                   | $6.53 \times 10^4$   | 0.012          |                                |
| 666-715 nm      | $J = 4$                                   | $174.61 \times 10^4$ | 0.312          |                                |

\*This table was compiled according to the corrected emission spectrum of **1** shown in Fig. S6.

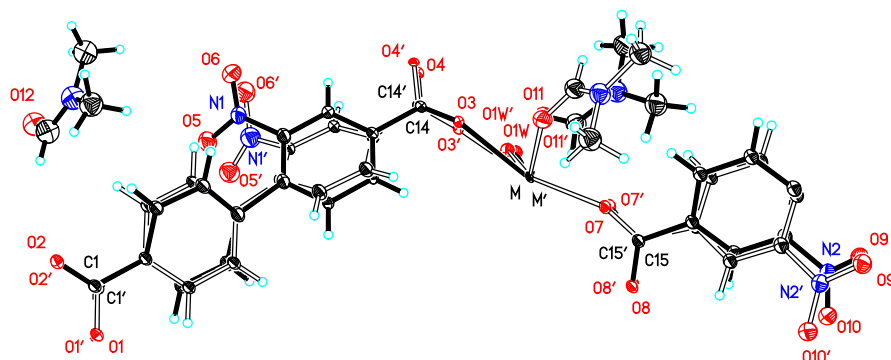

**Fig. S1** The least asymmetric unit of complexes **1-8**, in which the two sets of positions were presented clearly. The M and M' represent the same lanthanide ions [ $\text{Ln}^{3+} = \text{Eu}^{3+}$  (**1**),  $\text{Gd}^{3+}$  (**2**),  $\text{Nd}^{3+}$  (**3**),  $\text{La}^{3+}$  (**4**),  $\text{Ce}^{3+}$  (**5**),  $\text{Pr}^{3+}$  (**6**),  $\text{Sm}^{3+}$  (**7**), and  $\text{Tb}^{3+}$  (**8**)] located at different positions.

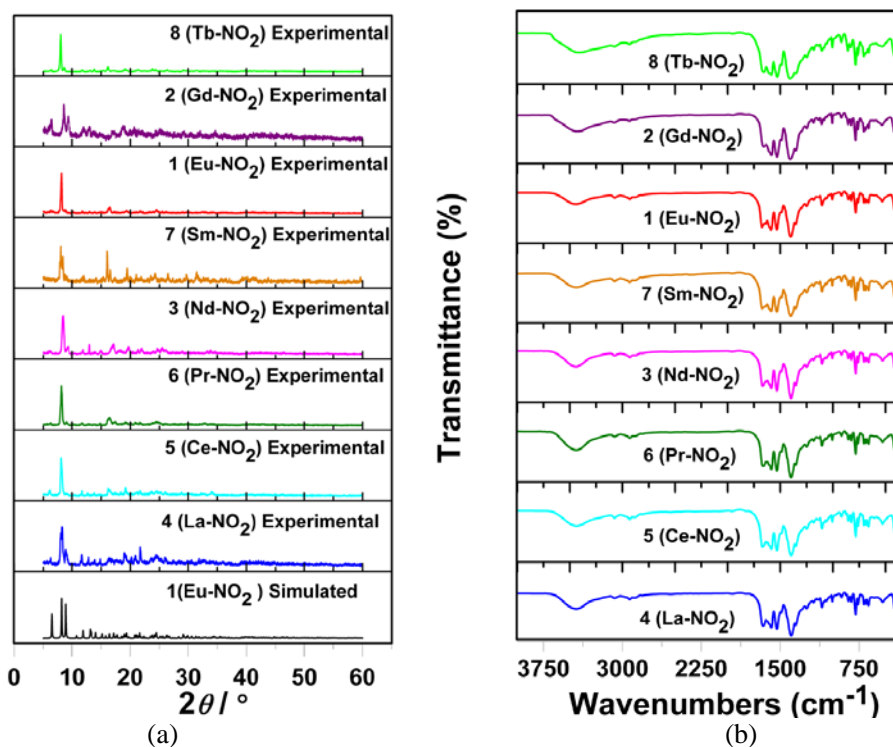

Fig. S2 The PXRD patterns (a) and IR spectra (b) of complexes 1-8.

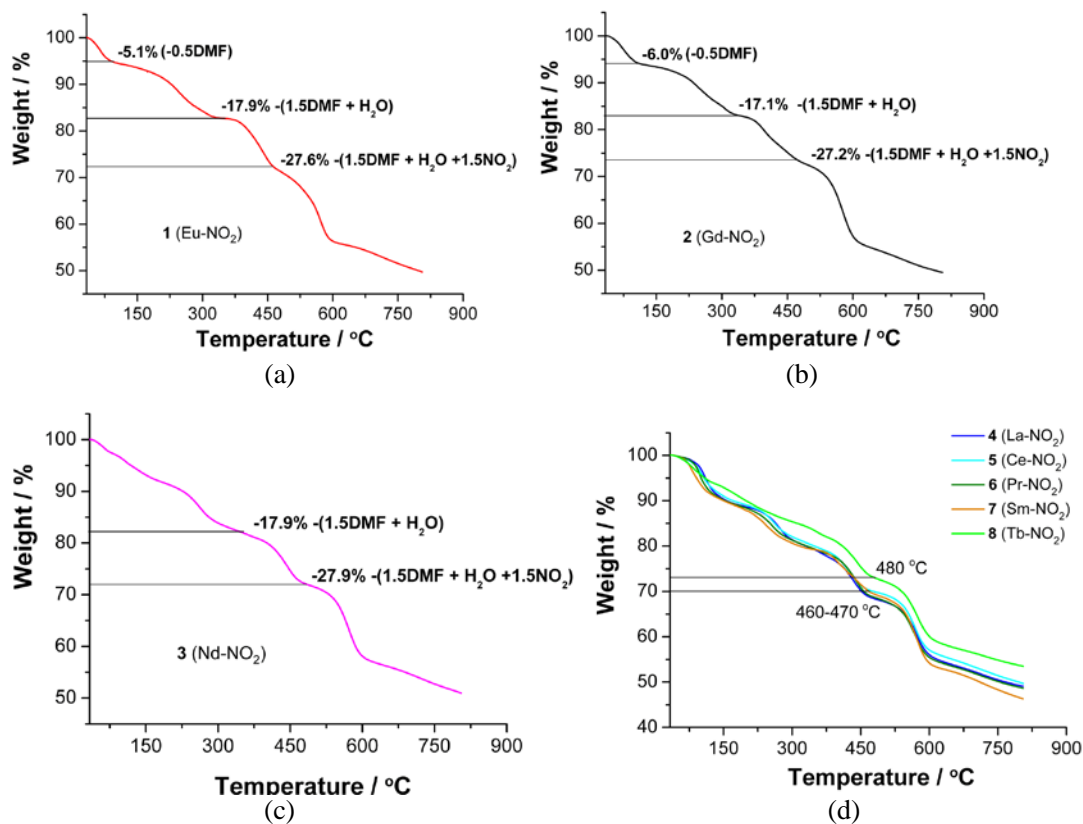

Fig. S3 TGA curves of complexes 1-8.

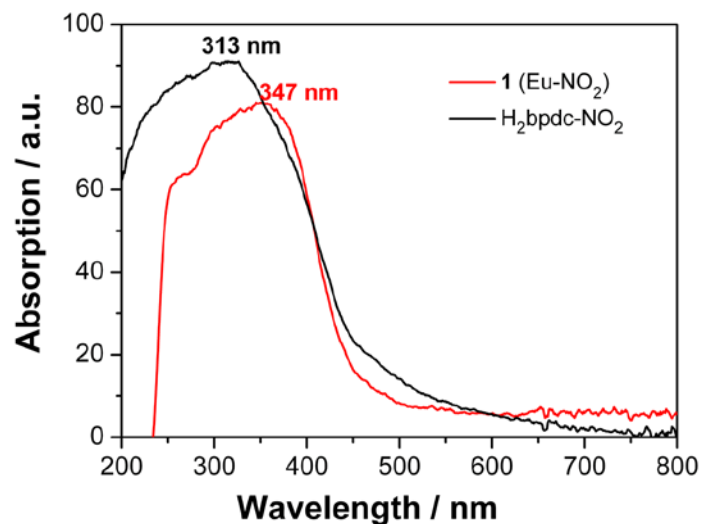

**Fig. S4** The room-temperature UV-Vis spectra of H<sub>2</sub>bpdC-NO<sub>2</sub> and complex **1** measured in the solid state.

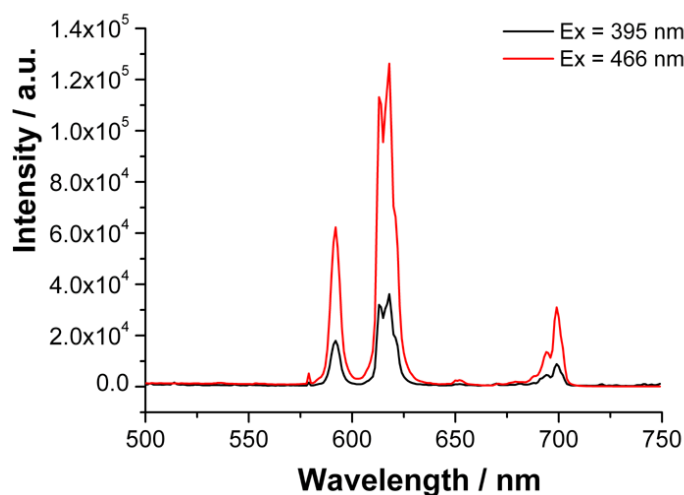

**Fig. S5** The solid-state emission spectra of complex **1** excited at 395 nm and 466 nm at room temperature, respectively (Ex slit = Em slit = 0.6 nm).

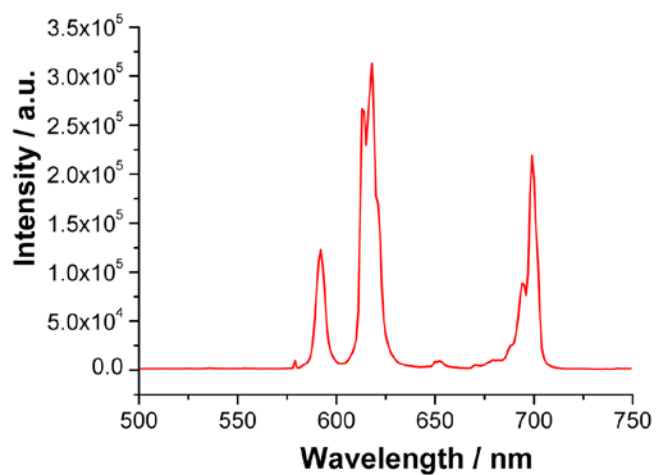

**Fig. S6** The solid-state **corrected** emission spectra of complex **1** excited at 466 nm at room temperature (Ex slit = Em slit = 0.6 nm).

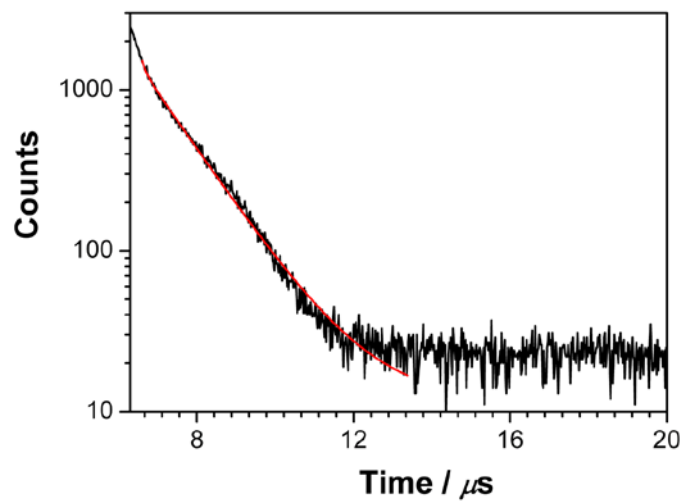

**Fig. S7** The decay curve of **3** monitored at 1055 nm and detected at room temperature ( $\lambda_{\text{ex}} = 582$  nm). The fitting curve with a monoexponential function is presented as the solid line.
